# Supplementary material
Source: PubMed Central journal article supplement (PMC4338533)
Supplement: NIHMS60901-supplement-2.pdf [file NIHMS60901-supplement-2.pdf]

Corresponding Author: Laura Cancedda

Manuscript Number: NN-A41722B

Manuscript Type: Article

# Main Figures: 8

# Supplementary Figures: 11

# Supplementary Tables: N/A

# Supplementary Videos: N/A

## Reporting Checklist for Nature Neuroscience

This checklist is used to ensure good reporting standards and to improve the reproducibility of published results. For more information, please read [Reporting Life Sciences Research](#).

Please note that in the event of publication, it is mandatory that authors include all relevant methodological and statistical information in the manuscript.

### ► Statistics reporting, by figure

- Please specify the following information for each panel reporting quantitative data, and where each item is reported.
- Each figure legend should ideally contain an exact sample size (n) for each experimental group/condition, where n is an exact number and not a range, a clear definition of how n is defined (for example x cells from x slices from x animals from x litters, collected over x days), a description of the statistical test used, the results of the tests, any descriptive statistics and clearly defined error bars if applicable.
- For any experiments using custom statistics, please indicate the test used and stats obtained for each experiment.
- Each figure legend should include a statement of how many times the experiment shown was replicated in the lab; the details of sample collection should be sufficiently clear so that the replicability of the experiment is obvious to the reader.
- For experiments reported in the text but not in the figures, please use the page number instead of the figure number.

**Note:** Mean and standard deviation are not appropriate on small samples, and plotting independent data points is usually more informative. When technical replicates are reported, error and significance measures reflect the experimental variability and not the variability of the biological process, and it is misleading not to state this clearly.

|         | TEST USED     |                 | n         |                                      |                                    | DESCRIPTIVE STATS (AVERAGE, VARIANCE) |                             | P VALUE   |             | DEGREES OF FREEDOM & F/t/z/R/ETC VALUE |                  |           |
|---------|---------------|-----------------|-----------|--------------------------------------|------------------------------------|---------------------------------------|-----------------------------|-----------|-------------|----------------------------------------|------------------|-----------|
|         | FIGURE NUMBER | WHICH TEST?     | PAGE      | EXACT VALUE                          | DEFINED?                           | PAGE                                  | REPORTED?                   | PAGE      | EXACT VALUE | PAGE                                   | VALUE            | PAGE      |
| example | 1a            | one-way ANOVA   | 4         | 9, 9, 10, 15                         | mice from at least 3 litters/group | 4                                     | error bars are mean +/- SEM | 4         | p = 0.044   | 4                                      | F(3, 36) = 2.97  | 4         |
| example | results, pg 6 | unpaired t-test | 6         | 15                                   | slices from 10 mice                | 6                                     | error bars are mean +/- SEM | 6         | p = 0.0006  | 6                                      | t(28) = 2.808    | 6         |
| +<br>-  | 1b            | Two-way ANOVA   | Fig leg 1 | 5, 6; 6, 7; 6, 8; 24, 20; 7, 8; 6, 7 | rats recorded per age/group        | Fig leg 1                             | Error bars are mean +/- SEM | Fig leg 1 | 0.0038      | Fig leg 1                              | F(5, 36) = 4.255 | Fig leg 1 |
| +<br>-  | 1c            | Two-way ANOVA   | Fig leg 1 | 2, 3; 3, 3                           | P17 rats recorded per group        | Fig leg 1                             | Error bars are mean +/- SEM | Fig leg 1 | 0.4453      | Fig leg 1                              | F(1, 7) = 0.6538 | Fig leg 1 |
| +<br>-  | 1d            | Two-way ANOVA   | Fig leg 1 | 3, 3; 3, 4                           | P20 aged rats recorded per group   | Fig leg 1                             | Error bars are mean +/- SEM | Fig leg 1 | 0.208       | Fig leg 1                              | F(1, 9) = 1.702  | Fig leg 1 |

|               |                    | TEST USED                  |             | n                                     |                                                    |           | DESCRIPTIVE STATS (AVERAGE, VARIANCE) |             | P VALUE  |           | DEGREES OF FREEDOM & F/t/z/R/ETC VALUE |           |
|---------------|--------------------|----------------------------|-------------|---------------------------------------|----------------------------------------------------|-----------|---------------------------------------|-------------|----------|-----------|----------------------------------------|-----------|
| FIGURE NUMBER | WHICH TEST?        | PAGE                       | EXACT VALUE | DEFINED?                              | PAGE                                               | REPORTED? | PAGE                                  | EXACT VALUE | PAGE     | VALUE     | PAGE                                   |           |
| +<br>-        | 1e                 | Two-way ANOVA              | Fig leg 1   | 3, 3; 4, 4                            | P26 aged rats recorded per group                   | Fig leg 1 | Error bars are mean +/- SEM           | Fig leg 1   | 0.7148   | Fig leg 1 | F(1, 9) = 0.1421                       | Fig leg 1 |
| +<br>-        | 1f                 | Two-way ANOVA              | Fig leg 1   | 12, 12; 8, 12                         | P35 aged rats recorded per group                   | Fig leg 1 | Error bars are mean +/- SEM           | Fig leg 1   | 0.003    | Fig leg 1 | F(1, 40) = 10.204                      | Fig leg 1 |
| +<br>-        | 1g                 | Two-way ANOVA              | Fig leg 1   | 3, 4; 3, 5                            | P45 aged rats recorded per group                   | Fig leg 1 | Error bars are mean +/- SEM           | Fig leg 1   | 0.4960   | Fig leg 1 | F(1, 11) = 0.4955                      | Fig leg 1 |
| +<br>-        | 1h                 | Two-way ANOVA              | Fig leg 1   | 2, 4; 2, 5                            | P75 aged rats recorded per group                   | Fig leg 1 | Error bars are mean +/- SEM           | Fig leg 1   | 0.7308   | Fig leg 1 | F(1, 9) = 0.1259                       | Fig leg 1 |
| +<br>-        | 2a                 | Two-way ANOVA on ranks     | Fig leg 2   | 6, 6; 6, 10; 8, 6; 32, 14; 6, 6; 4, 9 | slices recorded for age /group                     | Fig leg 2 | Error bars are mean +/- SEM           | Fig leg 2   | 0.00203  | Fig leg 2 | F(5, 101) = 2.2508                     | Fig leg 2 |
| +<br>-        | 2b                 | Student's t-test           | Fig leg 2   | 6, 6                                  | slices recorded from 3, 3 P17 aged rats per group  | Fig leg 2 | Error bars are mean +/- SEM           | Fig leg 2   | 0.92143  | Fig leg 2 | t(10) = -0.10115                       | Fig leg 2 |
| +<br>-        | 2c                 | Student's t-test           | Fig leg 2   | 6, 10                                 | slices recorded from 4, 4 P20 aged rats per group  | Fig leg 2 | Error bars are mean +/- SEM           | Fig leg 2   | 0.91100  | Fig leg 2 | t(14) = -0.11382                       | Fig leg 2 |
| +<br>-        | 2d                 | Student's t-test           | Fig leg 2   | 8, 6                                  | slices recorded from 4,3 P26 aged rats per group   | Fig leg 2 | Error bars are mean +/- SEM           | Fig leg 2   | 0.52825  | Fig leg 2 | t(12) = 0.64950                        | Fig leg 2 |
| +<br>-        | 2e                 | Mann-Whitney Rank Sum Test | Fig leg 2   | 32, 14                                | slices recorded from 18, 6 P35 aged rats per group | Fig leg 2 | Error bars are mean +/- SEM           | Fig leg 2   | <0.00001 | Fig leg 2 | T(14, 32) = 473.00000                  | Fig leg 2 |
| +<br>-        | 2f                 | Student's t-test           | Fig leg 2   | 6, 6                                  | slices recorded from 4, 4 P45 aged rats per group  | Fig leg 2 | Error bars are mean +/- SEM           | Fig leg 2   | 0.99092  | Fig leg 2 | t(10) = -0.011665                      | Fig leg 2 |
| +<br>-        | 2g                 | Student's t-test           | Fig leg 2   | 4, 9                                  | slices recorded from 1, 2 P75 aged rats per group  | Fig leg 2 | Error bars are mean +/- SEM           | Fig leg 2   | 0.87431  | Fig leg 2 | t(11) = 0.16191                        | Fig leg 2 |
| +<br>-        | 3b total dLGN area | Student's t-test           | Fig leg 3   | 3, 5                                  | rats processed per group                           | Fig leg 3 | Error bars are mean +/- SEM           | Fig leg 3   | 0.831    | Fig leg 3 | t(6) = 0.223                           | Fig leg 3 |
| +<br>-        | 3b contra area     | Student's t-test           | Fig leg 3   | 3, 5                                  | rats processed per group                           | Fig leg 3 | Error bars are mean +/- SEM           | Fig leg 3   | 0.16996  | Fig leg 3 | t(6) = -1.559                          | Fig leg 3 |
| +<br>-        | 3b ipsi area       | Student's t-test           | Fig leg 3   | 3, 5                                  | rats processed per group                           | Fig leg 3 | Error bars are mean +/- SEM           | Fig leg 3   | 0.616    | Fig leg 3 | t(6) = 0.529                           | Fig leg 3 |
| +<br>-        | 3b overlap         | Student's t-test           | Fig leg 3   | 3, 5                                  | rats processed per group                           | Fig leg 3 | Error bars are mean +/- SEM           | Fig leg 3   | 0.666    | Fig leg 3 | t(6) = -0.454                          | Fig leg 3 |
| +<br>-        | 3f                 | Two-way ANOVA on ranks     | Fig leg 3   | 19, 11                                | slices processed from 6, 3 rats per group          | Fig leg 3 | Error bars are mean +/- SEM           | Fig leg 3   | 0.42479  | Fig leg 3 | F(2, 84) = 1.33106                     | Fig leg 3 |
| +<br>-        | 4a                 | Chi-square                 | Fig leg 4   | 14, 11                                | rats processed per group                           | Fig leg 4 | Error bars are mean +/- SEM           | Fig leg 4   | 0.199    | Fig leg 4 | chi (4) = 6.00                         | Fig leg 4 |
| +<br>-        | 4b                 | Two-way RM ANOVA           | Fig leg 4   | 7, 3                                  | rats processed per group                           | Fig leg 4 | Error bars are mean +/- SEM           | Fig leg 4   | 0.9683   | Fig leg 4 | F(5, 40) = 0.1805                      | Fig leg 4 |
| +<br>-        | 4c                 | Two-way RM ANOVA           | Fig leg 4   | 4, 4                                  | rats processed per group                           | Fig leg 4 | Error bars are mean +/- SEM           | Fig leg 4   | 0.1509   | Fig leg 4 | F(4, 20) = 1.8935                      | Fig leg 4 |

|        |           |                            |           |                     |                                         |           |                             |           |                                               |           |                                                             |           |
|--------|-----------|----------------------------|-----------|---------------------|-----------------------------------------|-----------|-----------------------------|-----------|-----------------------------------------------|-----------|-------------------------------------------------------------|-----------|
| +<br>- | 4d        | Student's t-test           | Fig leg 4 | 5, 8                | rats recorded per group                 | Fig leg 4 | Error bars are mean +/- SEM | Fig leg 4 | 0.4660                                        | Fig leg 4 | t(11) = 0.7551                                              | Fig leg 4 |
| +<br>- | 4e        | Student's t-test           | Fig leg 4 | 5, 7                | rats recorded per group                 | Fig leg 4 | Error bars are mean +/- SEM | Fig leg 4 | 0.3557                                        | Fig leg 4 | t(10) = 0.96824                                             | Fig leg 4 |
| +<br>- | 4f        | Student's t-test           | Fig leg 4 | 7, 7                | rats recorded per group                 | Fig leg 4 | Error bars are mean +/- SEM | Fig leg 4 | Bin: 0.3850<br>Contra: 0.5447<br>Ipsi: 0.7574 | Fig leg 4 | t(12) = -0.901457<br>t(12) = -0.623307<br>t(12) = -0.315991 | Fig leg 4 |
| +<br>- | 4g        | Student's t-test           | Fig leg 4 | 7, 7                | rats recorded per group                 | Fig leg 4 | Error bars are mean +/- SEM | Fig leg 4 | 0.9928                                        | Fig leg 4 | t(12) = 0.00920693                                          | Fig leg 4 |
| +<br>- | 5a        | One-way ANOVA              | Fig leg 5 | 24, 20, 7, 8        | rats recorded per group                 | Fig leg 5 | Error bars are mean +/- SEM | Fig leg 5 | 0.000022                                      | Fig leg 5 | F(3, 55) = 10.0427                                          | Fig leg 5 |
| +<br>- | 5b        | One-way ANOVA              | Fig leg 5 | 28, 14, 14, 9       | slices recorded per group               | Fig leg 5 | Error bars are mean +/- SEM | Fig leg 5 | 0.00057                                       | Fig leg 5 | F(3,61) = 6.67813                                           | Fig leg 5 |
| +<br>- | 5c        | Student's t-test           | Fig leg 5 | 7, 7                | serum samples per group                 | Fig leg 5 | Error bars are mean +/- SEM | Fig leg 5 | 0.02423                                       | Fig leg 5 | t(12) = -2.57709                                            | Fig leg 5 |
| +<br>- | 6a        | Student's t-test           | Fig leg 6 | 9, 9                | cells recorded per group                | Fig leg 6 | Error bars are mean +/- SEM | Fig leg 6 | 0.04512                                       | Fig leg 6 | t(16) = 2.17333                                             | Fig leg 6 |
| +<br>- | 6b        | Student's t-test           | Fig leg 6 | 9, 9                | cells recorded per group                | Fig leg 6 | Error bars are mean +/- SEM | Fig leg 6 | 0.42577                                       | Fig leg 6 | t(16) = 0.81728                                             | Fig leg 6 |
| +<br>- | 6c        | Student's t-test           | Fig leg 6 | 6, 5                | rats processed per group                | Fig leg 6 | Error bars are mean +/- SEM | Fig leg 6 | 0.03938                                       | Fig leg 6 | t(9) = 2.40794                                              | Fig leg 6 |
| +<br>- | 6e WFA    | Mann-Whitney rank sum test | Fig leg 6 | 42, 34              | slices from 6, 5 rats per group         | Fig leg 6 | box chart                   | Fig leg 6 | 0.019                                         | Fig leg 6 | T(34, 42) = 1083.500                                        | Fig leg 6 |
| +<br>- | 6e PV     | Student's t-test           | Fig leg 6 | 48, 40              | slices from 6, 5 rats per group         | Fig leg 6 | Error bars are mean +/- SEM | Fig leg 6 | 0.511                                         | Fig leg 6 | t(86) = 0.660                                               | Fig leg 6 |
| +<br>- | 6e WFA-PV | Mann-Whitney rank sum test | Fig leg 6 | 46, 35              | slices from 6, 5 rats per group         | Fig leg 6 | box chart                   | Fig leg 6 | 0.000000000000000001                          | Fig leg 6 | T(35, 46) = 630.000                                         | Fig leg 6 |
| +<br>- | 7b        | Two-way ANOVA              | Fig leg 7 | 12, 15, 9, 15       | triplicates from 4,5,3,5 rats per group | Fig leg 7 | Error bars are mean +/- SEM | Fig leg 7 | 0.00317                                       | Fig leg 7 | F(1,47) = 9.67641                                           | Fig leg 7 |
| +<br>- | 7c        | Two-way ANOVA              | Fig leg 7 | 4, 5, 3, 3          | rats processed per group                | Fig leg 7 | Error bars are mean +/- SEM | Fig leg 7 | 0.013                                         | Fig leg 7 | F(1, 11) = 1.713                                            | Fig leg 7 |
| +<br>- | 7e        | Two-way ANOVA              | Fig leg 7 | 12, 12; 8, 12; 4, 6 | rats recorded per group                 | Fig leg 7 | Error bars are mean +/- SEM | Fig leg 7 | 0.0020                                        | Fig leg 7 | F(2, 48) = 7.0822                                           | Fig leg 7 |
| +<br>- | 7f        | Student's t-test           | Fig leg 7 | 8, 4                | rats recorded per group                 | Fig leg 7 | Error bars are mean +/- SEM | Fig leg 7 | 0.0304                                        | Fig leg 7 | t(10) = 2.519                                               | Fig leg 7 |
| +<br>- | 7g        | One-way ANOVA              | Fig leg 7 | 32, 14, 9           | slices recorded per group               | Fig leg 7 | Error bars are mean +/- SEM | Fig leg 7 | 0.00007                                       | Fig leg 7 | F(2, 52) = 11.50863                                         | Fig leg 7 |
| +<br>- | 7h        | Student's t-test           | Fig leg 7 | 14, 9               | slices recorded per group               | Fig leg 7 | Error bars are mean +/- SEM | Fig leg 7 | 0.00542                                       | Fig leg 7 | t(21) = 3.09991                                             | Fig leg 7 |
| +<br>- | 8a        | Student's t-test           | Fig leg 8 | 9, 14               | cells recorded per group                | Fig leg 8 | Error bars are mean +/- SEM | Fig leg 8 | 0.01232                                       | Fig leg 8 | t(21) = -2.73804                                            | Fig leg 8 |
| +<br>- | 8b        | Mann-Whitney rank sum test | Fig leg 8 | 5, 6                | rats processed per group                | Fig leg 8 | Error bars are mean +/- SEM | Fig leg 8 | 0.004                                         | Fig leg 8 | T(5, 6) = 15.000                                            | Fig leg 8 |

|        |                |                            |                  |        |                                            |                  |                             |                  |         |                  |                      |                  |
|--------|----------------|----------------------------|------------------|--------|--------------------------------------------|------------------|-----------------------------|------------------|---------|------------------|----------------------|------------------|
| +<br>- | 8c             | Student's t-test           | Fig leg 8        | 34, 32 | slices from 5, 5 rats per group            | Fig leg 8        | box chart                   | Fig leg 8        | 0.019   | Fig leg 8        | t(64) = -2.409       | Fig leg 8        |
| +<br>- | suppl.fi g. 2  | Mann-Whitney rank sum test | supplementary, 2 | 8, 12  | rats recorded per group                    | supplementary, 2 | box chart                   | supplementary, 2 | 0.002   | supplementary, 2 | T(37, 274) = 7312.50 | supplementary, 2 |
| +<br>- | suppl.fi g. 3c | Student's t-test           | suppl.fi g. 3    | 22, 21 | GFP positive cells from 3,4 rats per group | suppl.fi g. 3    | Error bars are mean +/- SEM | suppl.fi g. 3    | 0.50160 | suppl.fi g. 3    | t(41) = 0.67796      | suppl.fi g. 3    |
| +<br>- | suppl.fi g. 3d | Student's t-test           | suppl.fi g. 3    | 22, 21 | GFP positive cells from 3,4 rats per group | suppl.fi g. 3    | Error bars are mean +/- SEM | suppl.fi g. 3    | 0.64579 | suppl.fi g. 3    | t(41) = 0.46303      | suppl.fi g. 3    |
| +<br>- | suppl.fi g. 4  | Two-way RM ANOVA           | suppl.fi g. 4    | 6, 6   | rats per group                             | suppl.fi g. 4    | Error bars are mean +/- SEM | suppl.fi g. 4    | 0.65971 | suppl.fi g. 4    | F(5, 50) = 0.02086   | suppl.fi g. 4    |
| +<br>- | suppl.fi g. 5a | Student's t-test           | suppl.fi g. 5    | 7, 8   | cells per group                            | suppl.fi g. 5    | Error bars are mean +/- SEM | suppl.fi g. 5    | 0.42634 | suppl.fi g. 5    | t(13) = -0.82120     | suppl.fi g. 5    |
| +<br>- | suppl.fi g. 5b | Student's t-test           | suppl.fi g. 5    | 7, 8   | cells per group                            | suppl.fi g. 5    | Error bars are mean +/- SEM | suppl.fi g. 5    | 0.06780 | suppl.fi g. 5    | t(13) = 1.99202      | suppl.fi g. 5    |
| +<br>- | suppl.fi g. 5c | Mann-Whitney rank sum test | suppl.fi g. 5    | 7, 8   | cells per group                            | suppl.fi g. 5    | Error bars are mean +/- SEM | suppl.fi g. 5    | 0.77887 | suppl.fi g. 5    | T(7, 8) = 53.50000   | suppl.fi g. 5    |
| +<br>- | suppl.fi g. 5d | Mann-Whitney rank sum test | suppl.fi g. 5    | 9,7    | cells per group                            | suppl.fi g. 5    | Error bars are mean +/- SEM | suppl.fi g. 5    | 1.00000 | suppl.fi g. 5    | T(7, 9) = 60.00000   | suppl.fi g. 5    |
| +<br>- | suppl.fi g. 5e | Mann-Whitney rank sum test | suppl.fi g. 5    | 9, 7   | cells per group                            | suppl.fi g. 5    | Error bars are mean +/- SEM | suppl.fi g. 5    | 0.09034 | suppl.fi g. 5    | T(7, 9) = 76.00000   | suppl.fi g. 5    |
| +<br>- | suppl.fi g. 6b | Student's t-test           | suppl.fi g. 6b   | 4, 5   | rats per group                             | suppl.fi g. 6b   | Error bars are mean +/- SEM | suppl.fi g. 6b   | 0.025   | suppl.fi g. 6b   | t(7) = -2.832        | suppl.fi g. 6b   |
| +<br>- | suppl.fi g. 7b | Mann-Whitney rank sum test | suppl.fi g. 7    | 6, 5   | rats per group                             | suppl.fi g. 7    | Error bars are mean +/- SEM | suppl.fi g. 7    | 0.93074 | suppl.fi g. 7    | T(5, 6) = 31.00000   | suppl.fi g. 7    |
| +<br>- | suppl.fi g. 8a | Student's t-test           | suppl.fi g. 8    | 8, 6   | cells per group                            | suppl.fi g. 8    | Error bars are mean +/- SEM | suppl.fi g. 8    | 0.36698 | suppl.fi g. 8    | t(12) = -0.93752     | suppl.fi g. 8    |
| +<br>- | suppl.fi g. 8b | Student's t-test           | suppl.fi g. 8    | 8, 6   | cells per group                            | suppl.fi g. 8    | Error bars are mean +/- SEM | suppl.fi g. 8    | 0.56289 | suppl.fi g. 8    | t(12) = -0.59501     | suppl.fi g. 8    |
| +<br>- | suppl.fi g. 8c | Student's t-test           | suppl.fi g. 8    | 3, 3   | rats per group                             | suppl.fi g. 8    | Error bars are mean +/- SEM | suppl.fi g. 8    | 0.7563  | suppl.fi g. 8    | t(4) = -0.33237      | suppl.fi g. 8    |
| +<br>- | suppl.fi g. 9a | Student's t-test           | suppl.fi g. 9    | 9, 7   | cells per group                            | suppl.fi g. 9    | Error bars are mean +/- SEM | suppl.fi g. 9    | 0.17965 | suppl.fi g. 9    | t(14) = -1.41247     | suppl.fi g. 9    |

|        |                                  |                  |                          |       |                                       |                          |                                |                          |         |                          |                  |                          |
|--------|----------------------------------|------------------|--------------------------|-------|---------------------------------------|--------------------------|--------------------------------|--------------------------|---------|--------------------------|------------------|--------------------------|
| +<br>- | suppl.fi<br>g.<br>9b             | Student's t-test | sup<br>pl.fi<br>g.<br>9  | 9, 7  | cells per group                       | sup<br>pl.fi<br>g.<br>9  | Error bars are<br>mean +/- SEM | sup<br>pl.fi<br>g.<br>9  | 0.71180 | sup<br>pl.fi<br>g.<br>9  | t(14) = -0.37703 | sup<br>pl.fi<br>g.<br>9  |
| +<br>- | suppl.fi<br>g.<br>9c             | Student's t-test | sup<br>pl.fi<br>g.<br>9  | 4, 5  | rats per group                        | sup<br>pl.fi<br>g.<br>9  | Error bars are<br>mean +/- SEM | sup<br>pl.fi<br>g.<br>9  | 0.5330  | sup<br>pl.fi<br>g.<br>9  | t(7) = -0.65565  | sup<br>pl.fi<br>g.<br>9  |
| +<br>- | suppl.fi<br>g.<br>9d             | Student's t-test | sup<br>pl.fi<br>g.<br>9  | 4, 4  | rats per group                        | sup<br>pl.fi<br>g.<br>9  | box chart                      | sup<br>pl.fi<br>g.<br>9  | 0.76653 | sup<br>pl.fi<br>g.<br>9  | t(35) = 0.29924  | sup<br>pl.fi<br>g.<br>9  |
| +<br>- | suppl.fi<br>g.<br>10b            | Student's t-test | sup<br>pl.fi<br>g.<br>10 | 8, 6  | slices from 4, 3<br>rats<br>per group | sup<br>pl.fi<br>g.<br>10 | Error bars are<br>mean +/- SEM | sup<br>pl.fi<br>g.<br>10 | 0.43334 | sup<br>pl.fi<br>g.<br>10 | t(12) = 0.81068  | sup<br>pl.fi<br>g.<br>10 |
| +<br>- | results,<br>pg 7,<br>P35<br>AMPA | Student's t-test | resu<br>lts,<br>pg 7     | 9, 10 | cells per group                       | resu<br>lts,<br>pg 7     | mean +/- SEM                   | resu<br>lts,<br>pg 7     | 0.50074 | resu<br>lts,<br>pg 7     | t(17) = 0.68798  | resu<br>lts,<br>pg 7     |
| +<br>- | results,<br>pg 9,<br>P26         | Student's t-test | resu<br>lts,<br>pg 9     | 8, 6  | cells per group                       | resu<br>lts,<br>pg 9     | mean +/- SEM                   | resu<br>lts,<br>pg 9     | 0.67098 | resu<br>lts,<br>pg 9     | t(12) = 0.43543  | resu<br>lts,<br>pg 9     |
| +<br>- | results,<br>pg 9,<br>P75         | Student's t-test | resu<br>lts,<br>pg 9     | 9, 7  | cells per group                       | resu<br>lts,<br>pg 9     | mean +/- SEM                   | resu<br>lts,<br>pg 9     | 0.64366 | resu<br>lts,<br>pg 9     | t(14) = 0.47277  | resu<br>lts,<br>pg 9     |

## ► Representative figures

1. Are any representative images shown (including Western blots and immunohistochemistry/staining) in the paper?

If so, what figure(s)?

Representative images are shown in Fig. 2b, 2c, 2d, 2e, 2f, 2g, 3b, 3d, 3e, 6a, 6b, 6c, 6d, 7g, 8a, 8b, 8c, Suppl. Fig.1, Suppl. Fig.3b, Suppl. Fig.7a, Suppl. Fig.8a-c, Suppl. Fig.9a-d, Suppl. Fig. 10a.

2. For each representative image, is there a clear statement of how many times this experiment was successfully repeated and a discussion of any limitations in repeatability?

If so, on what page(s) is this reported?

With exception of Fig 3d, each of the images is followed by a summary graph with all experimental points, the average, and standard error of the mean.  
For figure 3d, the data sample is the same of Suppl. Figure 3 (4 rats for bumetanide, 3 for controls)

## ► Statistics and general methods

1. Is there a justification of the sample size?

If so, how was it justified?

On what page(s)?

Even if no sample size calculation was performed, authors should report why the sample size is adequate to measure their effect size.

Our laboratories have a long-standing experience in monocular deprivation, visual cortical LTP, intraocular injection, and in utero electroporation. Thus, we have a clear idea of the variability of data samples in these kinds of experiments. Sample size was calculated by the sample-size calculator on Sigma-plot 11.0, which takes into account the expected difference of the means, the expected standard deviation, and the desired power (we set the power to be higher than 0.05), and the alpha value (set for our experiments at 0.05).

2. Are statistical tests justified as appropriate for every figure?

On what page(s)?

The criteria for choosing a specific statistical test has been described on page 32 (Statistical analysis).

- a. If there is a section summarizing the statistical methods in the methods, is the statistical test for each experiment clearly defined?
- Yes, as described on Page 32.
- b. Do the data meet the assumptions of the specific statistical test you chose (e.g. normality for a parametric test)?
- Where is this described?
- Yes, as described on page 32.
- c. Is there any estimate of variance within each group of data?
- Is the variance similar between groups that are being statistically compared?
- Where is this described?
- Variance of all averages for each group is estimated by SEM. Yes. We performed all statistical tests with Sigma-plot 11.0. Before performing any comparison test, the program performs an estimate of variance for each group of data, to ensure that the variance is similar between groups. This has been reported on page 32.
- d. Are tests specified as one- or two-sided?
- The tests are two sided (reported on page 32).
- e. Are there adjustments for multiple comparisons?
- Yes
3. Are criteria for excluding data points reported?
- Was this criterion established prior to data collection?
- On what page(s) is this described?
- N/A.  
No data point were excluded from the analysis.
4. Define the method of randomization used to assign subjects (or samples) to the experimental groups and to collect and process data.
- If no randomization was used, state so.
- On what page(s) does this appear?
- Method for sample randomization:
- For image acquisition at the confocal microscope, all slides were acquired in a random order and in a single session for each litter of animals to minimize errors caused by fluctuation in laser output and degradation of fluorescence.
- For electrophysiological recordings, care was used to record from one bumetanide- and one vehicle-injected animal on alternating days.
- For LTP, MD and behavioral experiments, animals treated with bumetanide or vehicle were litter mates.
- This info was reported in the manuscript on page 32.
- Where not otherwise specified, data collection and analysis were not performed blind to the conditions of the experiments.
5. Is a statement of the extent to which investigator knew the group allocation during the experiment and in assessing outcome included?
- If no blinding was done, is a statement to this effect included?
- On what page(s)?
- Data analysis of VEP, and image acquisition and data analysis of confocal images, and behavioral experiments were performed by an experimenter blind to the phenotype, as described on page 23, 28, 29.
6. For experiments in live vertebrates, is a statement of compliance with ethical guidelines/regulations included?
- On what page(s)?
- Yes, on page 23.

7. Is the species of the animals used reported?  
On what page(s)?
- Yes, the species is reported in the title, throughout the manuscript, and in details in the Method section (page 23).
8. Is the strain of the animals (including background strains of KO/transgenic animals used) reported?  
On what page(s)?
- Yes, the strain is reported in the Method section on page 23.
9. Is the sex of the animals/subjects used reported?  
On what page(s)?
- Yes, both males and females were used for the study. The info is reported on page 23.
10. Is the age of the animals/subjects reported?  
On what page(s)?
- Yes, throughout the manuscript and in the Figures.
11. For animals housed in a vivarium, is the light/dark cycle reported?  
On what page(s)?
- Yes, on page 23.
12. For animals housed in a vivarium, is the housing group (i.e. number of animals per cage) reported?  
On what page(s)?
- Our cages hosted only one dam/cage. For weaned (P21-75) animals/cage, 3-4 animals were usually hosted.
- This information is not reported in the manuscript.
13. For behavioral experiments, is the time of day reported (e.g. light or dark cycle)?  
On what page(s)?
- Behavioral experiments were performed in the morning. This information is not reported in the manuscript.
14. Is the previous history of the animals/subjects (e.g. prior drug administration, surgery, behavioral testing) reported?  
On what page(s)?
- Yes, this is reported for each figure in a schematic cartoon.
- a. If multiple behavioral tests were conducted in the same group of animals, is this reported?  
On what page(s)?
- N/A
15. If any animals/subjects were excluded from analysis, is this reported?  
On what page(s)?
- N/A. No animals were excluded from the analysis
- a. How were the criteria for exclusion defined?  
Where is this described?
- b. Specify reasons for any discrepancy between the number of animals at the beginning and end of the study.  
Where is this described?
- N/A

## ► Reagents

1. Have antibodies been validated for use in the system under study (assay and species)?

Yes.

(1) mouse anti-NKCC1 was previously described (Ge et al., 2006 Nature), and it was validated by experiments on NKCC1 KO, and by biological validation (Supplementary. Fig.1).  
 (2) rabbit anti-KCC2 was previously described (Ge et al., 2006 Nature) and by biological validation (Supplementary. Fig.1).  
 (3) rabbit anti-BDNF antibody was validated loading 0.05 ng of pure Human recombinant BDNF  
 (4) guinea pig anti-PV and WFA was previously described (Antonucci, F., et al. J Neurosci, 2012; Pizzorusso, T., et al., Science, 2002)  
 (5) mouse anti-trkB (Jovanovic JN, et al., Nature neurosci, 2000)  
 (6) mouse anti-GAD67 (Sgado', P., et al. Exp Neurol, 2013)

- a. Is antibody catalog number given?

On what page(s) does this appear?

Mouse anti-NKCC1 #T4, rabbit anti-KCC2 #07-432, rabbit anti-BDNF # sc-546, guinea pig anti-PV #195004, WFA #L1516-2mg, mouse anti-trkB #610101. mouse anti-GAD67 #MAB5406 . Catalog numbers, host species, dilution and company are reported in the manuscript.

- b. Where were the validation data reported (citation, supplementary information, Antibodypedia)?

On what page(s) does this appear?

(1) mouse anti-NKCC1, Acknowledgments on page 16, supplementary Fig.1; Ge et al., 2006, Nature  
 (2) rabbit anti-KCC2, Supplementary Fig.1; Ge et al., 2006, Nature  
 (3) guinea pig anti-PV, Antonucci, F., et al. J Neurosci, 2012  
 (4) WFA, Pizzorusso, T., et al., Science, 2002  
 (5) mouse anti-trkB (Jovanovic JN, et al., Nature neurosci, 2000)  
 (6) mouse anti-GAD67 (Sgado', P., et al. Exp Neurol, 2013)

2. If cell lines were used to reflect the properties of a particular tissue or disease state, is their source identified?

On what page(s)?

N/A

- a. Were they recently authenticated?

On what page(s) is this information reported?

## ► Data deposition

Data deposition in a public repository is mandatory for:

- Protein, DNA and RNA sequences
- Macromolecular structures
- Crystallographic data for small molecules
- Microarray data

Deposition is strongly recommended for many other datasets for which structured public repositories exist; more details on our data policy are available [here](#). We encourage the provision of other source data in supplementary information or in unstructured repositories such as [Figshare](#) and [Dryad](#).

1. Are accession codes for deposit dates provided?

On what page(s)?

Primers for RT-PCR are reported on page 31.



## ▶ Computer code/software

1. Is there any custom algorithm/software that is integral to the study that has not been previously reported?

If so, is this algorithm/software provided in a usable and readable form for the referees?

Indicate in what form this is provided.

Yes. For analysis of in vivo recordings we used a custom-made software written in LabView. The software is not available online because it is copyrighted.

## ▶ Human subjects

1. Which IRB approved the protocol?

Where is this stated?

N/A

2. Is demographic information on all subjects provided?

On what page(s)?

3. Is the number of human subjects, their age and sex clearly defined?

On what page(s)?

4. Are the inclusion and exclusion criteria (if any) clearly specified?

On what page(s)?

5. How well were the groups matched?

Where is this information described?

6. Is a statement confirming that informed consent was obtained from all subjects included?

On what page(s)?

7. For publication of patient photos, is a statement confirming that consent to publish was obtained included?

On what page(s)?

## ▶ fMRI studies

For papers reporting functional imaging (fMRI) results please ensure that these minimal reporting guidelines are met and that all this information is clearly provided in the methods:

1. Were any subjects scanned but then rejected for the analysis after the data was collected?

N/A

- a. If yes, is the number rejected and reasons for rejection described?  
On what page(s)?
2. Is the number of blocks, trials or experimental units per session and/or subjects specified?  
On what page(s)?
3. Is the length of each trial and interval between trials specified?
4. Is a blocked design used?  
If so, is length of blocks specified?
5. Is an event-related design being used?  
If so, how was the design optimized?
6. Is the task design clearly described?  
Where?
7. How was behavioral performance measured?
8. Are any planned comparisons being used?
- a. Are they clearly described?
- b. Is an ANOVA used?
9. For data acquisition, is a whole brain scan used?  
If not, state area of acquisition.
- a. How was this region determined?
10. Is the field strength (in Tesla) of the MRI system stated?
- a. Is the pulse sequence type (gradient/spin echo, EPI/spiral) stated?
11. Is the software used for data processing and pre-processing clearly stated?
12. For any anatomical imaging, is the coordinate space defined?
13. How was the brain image template space, name, modality and resolution determined?
14. How were anatomical locations determined?

15. Is the statistical model and estimation method clearly described?
16. Were any additional regressors (behavioral covariates, motion etc) used?
17. Is the contrast construction clearly defined?
18. Is a mixed/random effects or fixed inference used?
- a. If fixed effects inference used, is this justified?
19. Were repeated measures used (multiple measurements per subject)?
- a. If so, are the method to account for within subject correlation and the assumptions made about variance clearly stated?
20. If the threshold used for inference and visualization in figures varies, is this clearly stated?
21. Are statistical inferences corrected for multiple comparisons?
- a. If not, is this labeled as uncorrected?
22. Are the results based on an ROI (region of interest) analysis?
- a. If so, is the rationale clearly described?
- b. How were the ROI's defined (functional vs anatomical localization)?
23. Is there correction for multiple comparisons within each voxel?
24. For cluster-wise significance, is the cluster-defining threshold and the corrected significance level defined?

## ► Additional comments

Additional Comments
